# Supplementary material
Source: Springer Nature journal article supplement (https://www.springermedizin.de/resource/supplementary/13046_2011_485_MOESM2_ESM.pdf/9662332)

### Lymphoproliferation index - Patient #1

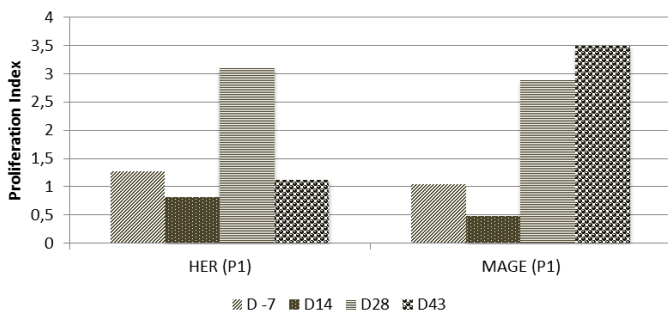

### Lymphoproliferation index - Patient #2

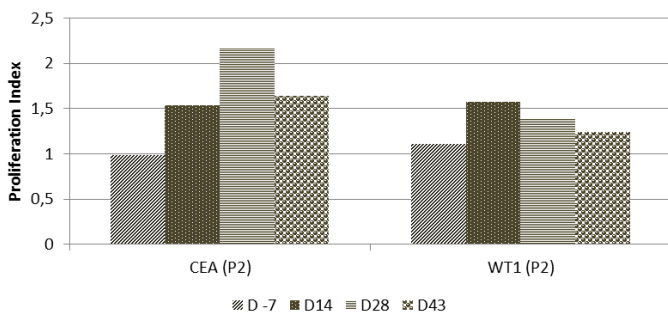

### Lymphoproliferation index - Patient #3

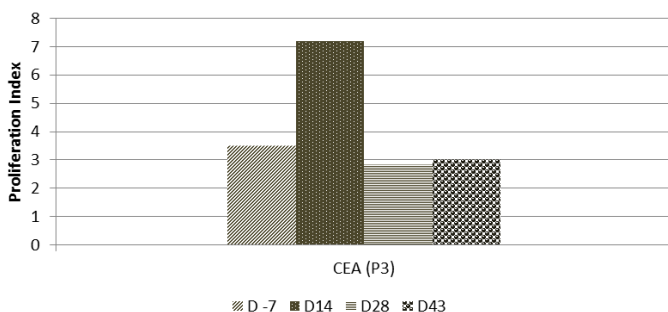

### Lymphoproliferation index - Patient #4

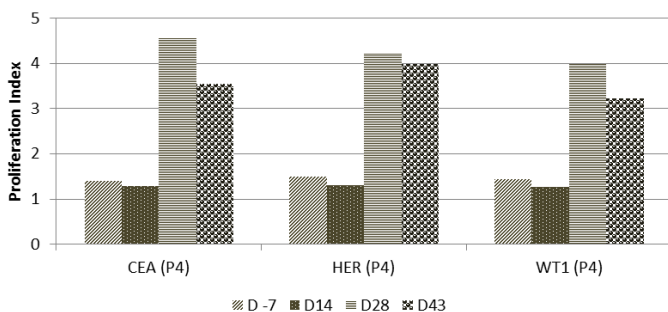

### Lymphoproliferation index - Patient #5

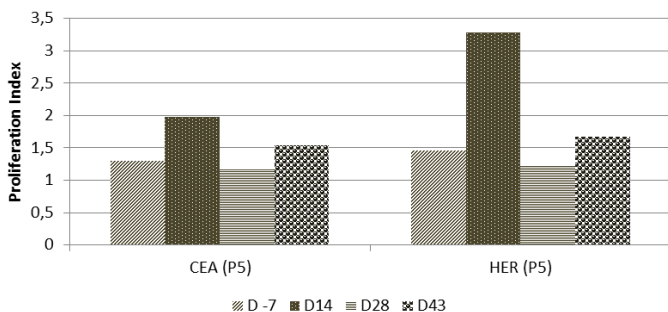

Supplement: MOESM2 [file 9662332]
